# Supplementary material
Source: PubMed Central journal article supplement (PMC6870877)
Supplement: NIHMS1542166-supplement-1.pdf [file NIHMS1542166-supplement-1.pdf]

August 29, 2019

**Elsevier, Inc**  
***Biomaterials***Professor Kam Leong, Editor-in-Chief  
Dr. Chai Hoon Quek, Managing Editor  
Suite 800, 230 Park Avenue  
New York, NY 10169  
Tel: +1 212 309 8100  
Fax: +1 212)309-8187  
E-mail: [biomaterials@elsevier.com](mailto:biomaterials@elsevier.com)  
ISSN: 0142-9612

On behalf of **Vinod Labhasetwar, Ph.D.**, (Staff, Biomedical Engineering, Lerner Research Institute), this letter serves as authorization by The Cleveland Clinic Foundation ("CCF"), which authorization includes that of **Richard Rozic, Nima Sharifi, M.D., Ronald Midura, Ph.D.**, and staff illustrator **David Schumick, BS., CMI.**, full-time employee of **CCF to Elsevier**, to publish the work further described in Attachment A ("Artwork") solely for the purposes set forth herein. *This authorization and license is an addendum to any agreement ("Author Agreement") signed between CCF and Elsevier related to the article and supersedes any language related to the Artwork within the Author Agreement that contradicts or is in conflict with this addendum. By incorporating the Artwork into the article as described below, Elsevier affirmatively agrees to this addendum and the licensing arrangement agreed to herein.*

CCF grants to Publisher, a royalty-free, perpetual, non-exclusive license to use the Artwork as they appears in the work **"Biomaterials"**, article; **"Synergistic Combination Treatment to Break Cross Talk Between Cancer Cells and Bone Cells to Inhibit Progression of Bone Metastasis"**. Such use may be made of this Artwork in the article in any format the Publisher utilizes. CCF further grants to Publisher the permission to use such Artwork in future publications and licensing arrangements as the Artwork appears within the article.

All rights, title and interest in the Artwork shall remain the sole property of CCF, including but not limited to copyright. The copyright attribution may not be removed from this Artwork and the words, "Reprinted with permission, Cleveland Clinic Center for Medical Art & Photography © 2019. All Rights Reserved." must accompany all such uses.

Sincerely,

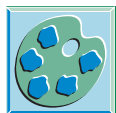Jeffrey J. Loerch, Medical Illustration  
Center for Medical Art and Photography - NA12  
The Cleveland Clinic Foundationcc: R.Rozic  
N.Sharifi  
R.Midura  
V.Labhasetwar  
D.schumick  
T.Christovich
